# Supplementary material
Source: PubMed Central journal article supplement (PMC6779490)

# Supplemental Fig 1

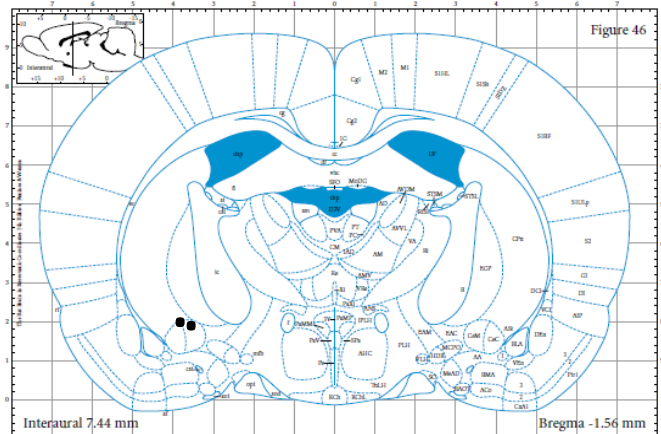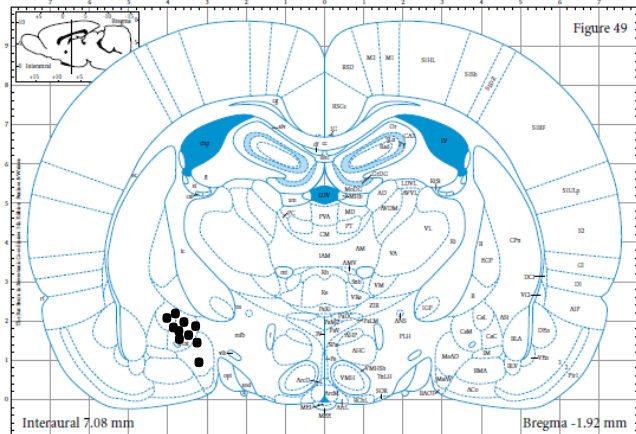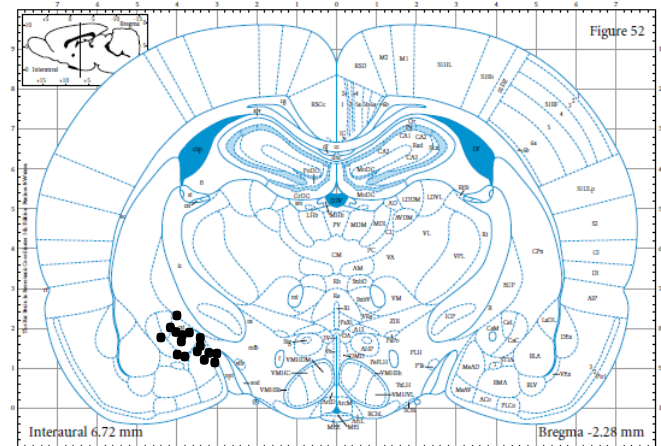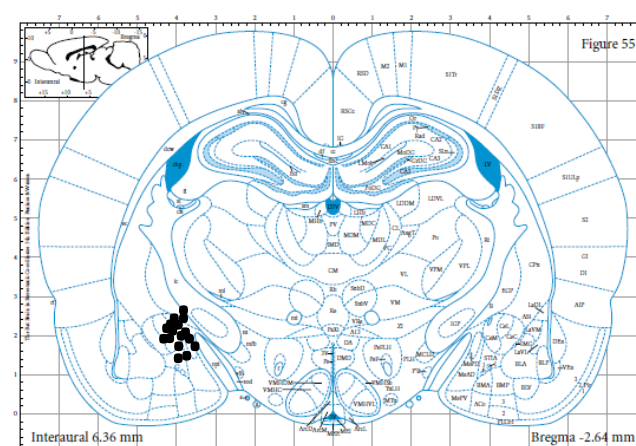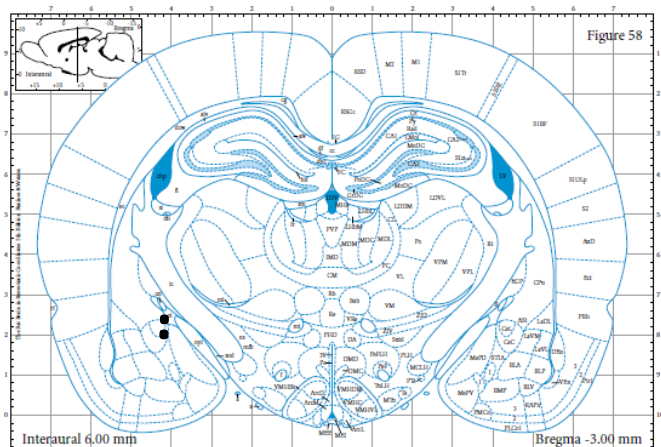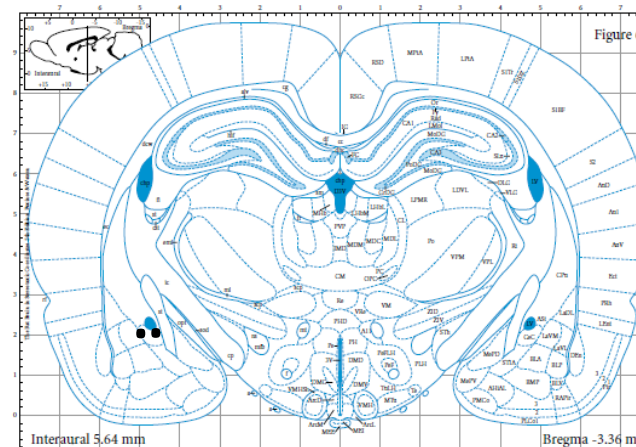

A)

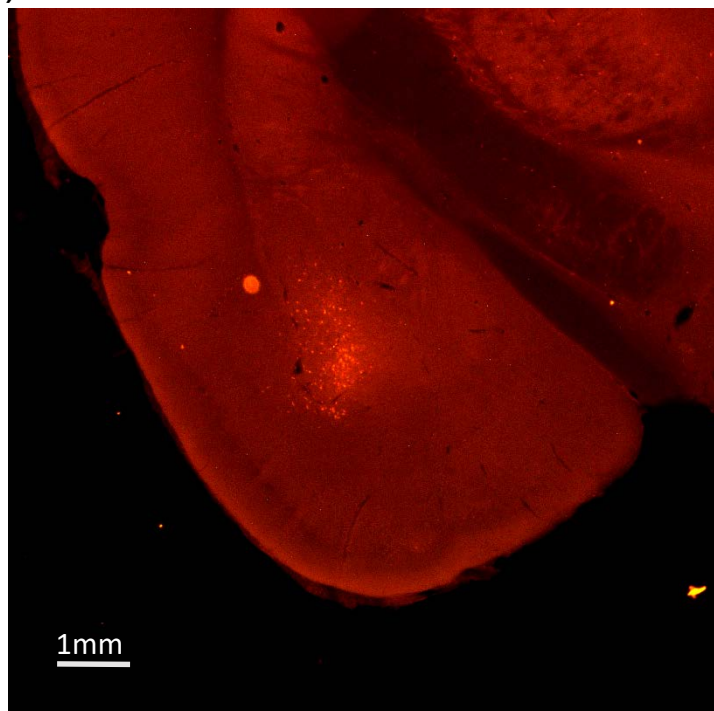

B)

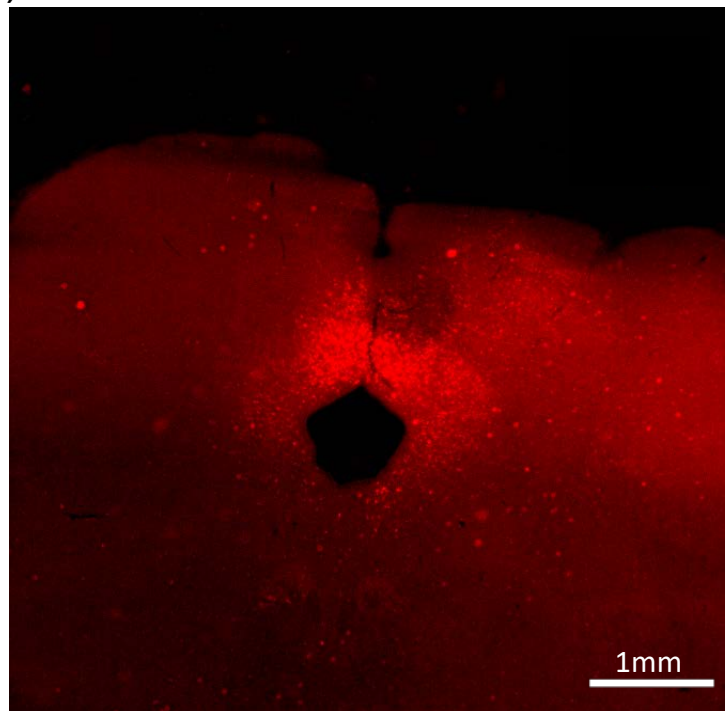

C)

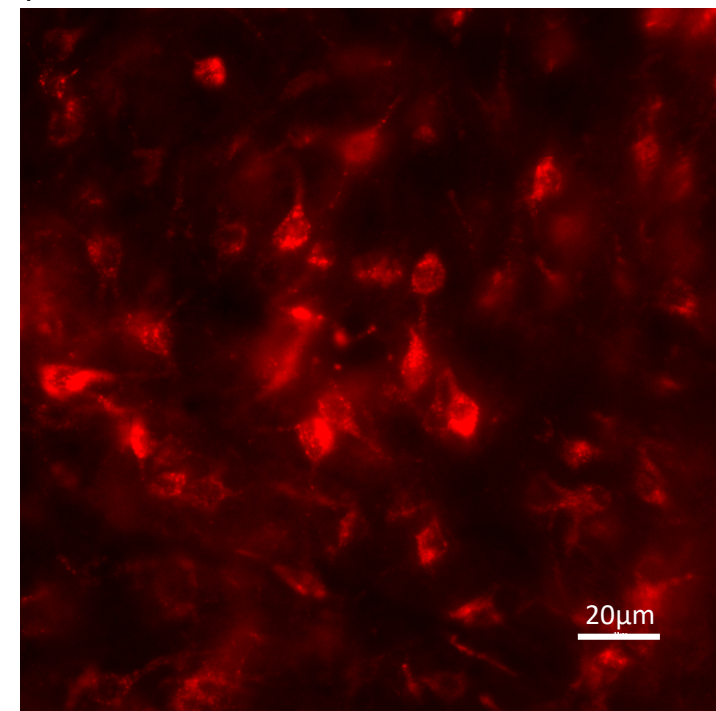

Supplement: NIHMS1044884-supplement-Supp_FigS1-2.pdf [file NIHMS1044884-supplement-Supp_FigS1-2.pdf]
